# Supplementary material for: Transmembrane oligomeric intermediates of pore forming toxin Cytolysin A determine leakage kinetics
Source: Royal Society of Chemistry journal article supplement (doi:10.1039/c7ra07304f), 2017-01-01
Supplement: c7ra07304f1.pdf [file c7ra07304f1.pdf]

# **SUPPLEMENTARY INFORMATION FOR "Transmembrane oligomeric intermediates of pore forming toxin Cytolysin A determine leakage kinetics"**

Ayush Agrawal<sup>1</sup>, K. Apoorva<sup>2</sup>, and K. G. Ayappa<sup>\*1,3</sup>

<sup>1</sup>*Department of Chemical Engineering, Indian Institute of Science, Bangalore-560012, India*

<sup>2</sup>*Department of Chemical Engineering, Indian Institute of Technology, Hyderabad- 502205, India*

<sup>3</sup>*Centre for Biosystems Science and Engineering, Indian Institute of Science, Bangalore - 560012, India*

---

\*Corresponding Author

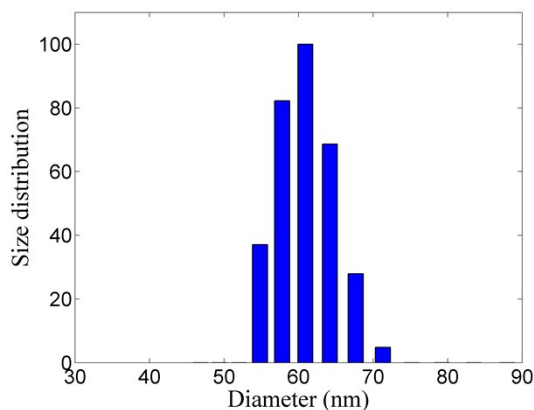

Figure 1: Typical SUV vesicle distribution obtained from dynamic light scattering experiments.

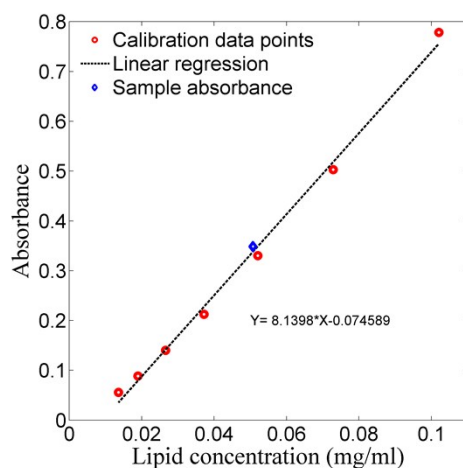

Figure 2: Determination of lipid concentration using the ammonium ferrothiocyanate method<sup>1</sup>. A linear fit is used for the absorbance data vs lipid concentration. The absorbance of a suitably diluted sample at a lipid concentration of 0.05 mg/ml is illustrated by the blue data point corresponding to a lipid concentration of 1.3 mg/ml. Lipid concentrations in our experiments were found to lie in the range of 1.0 - 1.3 mg/ml.

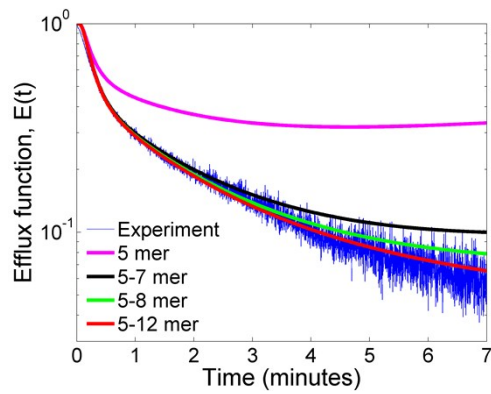

Figure 3: The influence of oligomer fractions on the temporal evolution of the calcein leakage data shows that it necessary to include higher order oligomers or arcs to capture the leakage over the entire duration of the experiment. The smaller oligomers ranging from 5-7 mers accurately capture the initial leakage transient indicating that these fractions play a dominant role at this stage. Contribution from higher order oligomers are required to capture the evolution of the leakage curve at later times.

| <b>Oligomers</b> | $\alpha_c$ | $\tau_f$ | <b>Proteins per vesicle (<math>\gamma</math>)</b> |
|------------------|------------|----------|---------------------------------------------------|
| 5-12             | 5.2        | 5.2      | 23                                                |
| 7-12             | 9.1        | 9.6      | 26                                                |
| 9-12             | 10.3       | 12.1     | 35                                                |
| 12               | 13.5       | 19.5     | 87                                                |

Table 1: The optimized parameters for the irreversible non-sequential oligomerization (IRNS) mechanism for different oligomer fractions that contribute to leakage.

| <b>Oligomers</b> | $\alpha_b$ | $\alpha_c$ | $\tau_f$ | <b>Proteins per vesicle (<math>\gamma</math>)</b> |
|------------------|------------|------------|----------|---------------------------------------------------|
| 5-12             | 0.286      | 6.7        | 3.5      | 50                                                |
| 7-12             | 0.087      | 5.5        | 5.7      | 54                                                |
| 9-12             | 0.065      | 8.9        | 7.9      | 90                                                |
| 12               | 0.021      | 7.3        | 11.4     | 227                                               |

Table 2: The optimized parameters for the reversible non-sequential oligomerization (RNS) mechanism for different oligomer fractions that contribute to leakage.

| <b>Oligomers</b> | $\alpha_c$ | $\tau_f$ | <b>Proteins per vesicle (<math>\gamma</math>)</b> |
|------------------|------------|----------|---------------------------------------------------|
| 5-12             | 7.0        | 5.5      | 65                                                |
| 7-12             | 0.38       | 14.2     | 266                                               |
| 9-12             | 0.075      | 14.6     | 379                                               |
| 12               | 0.04       | 13.7     | 416                                               |

Table 3: The optimized parameters for the irreversible sequential oligomerization (IRS) mechanism for different oligomer fractions that contribute to leakage.

## References

1. Stewart, J. C. M. Colorimetric determination of phospholipids with ammonium ferrioxalate. *Analytical biochemistry* 104, 10–14 (1980).
